# Supplementary material for: Co@Ir core–shell nanochain aerogels for the hydrogen evolution reaction and the oxygen evolution reaction in alkaline media
Source: Royal Society of Chemistry journal article supplement (doi:10.1039/d4nj02733g), 2024-01-01
Supplement: d4nj02733g1.pdf [file d4nj02733g1.pdf]

**Supplementary Information**

**Co@Ir Core-shell Nanochains Aerogels for  
Hydrogen Evolution Reaction and Oxygen  
Evolution Reaction in Alkaline Media**

Jiacheng Chen,<sup>abc</sup> Zihao Xie,<sup>abc</sup> Yujun Tang,<sup>c</sup> Zhenghua Tang,<sup>\*c</sup> and Xiufang Wang<sup>\*ab</sup>

<sup>a</sup> School of Pharmacy, Guangdong Pharmaceutical University, Guangzhou, 510006, China, Email: x\_f\_wang@163.com

<sup>b</sup> Guangdong Provincial Key Laboratory of Advanced Drug Delivery, Guangdong Provincial Engineering Center of Topical Precise Drug Delivery System, Guangdong Pharmaceutical University, Guangzhou, 510006, China

<sup>c</sup> New Energy Research Institute, School of Environment and Energy, South China University of Technology, Guangzhou Higher Education Mega Centre, Guangzhou, 510006, China, Email: zhht@scut.edu.cn

## Supplementary Tables

Table S1. The HER activity comparison between the Ir<sub>7</sub>Co<sub>3</sub> aerogel and recently reported top-level aerogel electrocatalysts in 1.0 M KOH.

| Catalyst                                                  | $\eta_{10}$ (mV) | Tafel slope (mV·dec <sup>-1</sup> ) | Reference |
|-----------------------------------------------------------|------------------|-------------------------------------|-----------|
| Ir <sub>7</sub> Co <sub>3</sub> aerogel                   | 20.4             | 28.87                               | This work |
| Ir <sub>5</sub> Co <sub>5</sub> aerogel                   | 73.0             | 118.77                              | This work |
| Ir <sub>3</sub> Co <sub>7</sub> aerogel                   | 206.8            | 237                                 | This work |
| Ir aerogel                                                | 34.5             | 57.81                               | This work |
| CoNiFe/MnO@CNTs                                           | 122              | 149                                 | 1         |
| Ru aerogel                                                | 272              | 41.6                                | 2         |
| NiSe <sub>2</sub> -CoSe <sub>2</sub>                      | 65               | 57.54                               | 3         |
| Ru <sub>08</sub> Ir <sub>2</sub> -350                     | 26               | 8.3                                 | 4         |
| P-CoCu                                                    | 142              | 101.75                              | 5         |
| RuNi <sub>7</sub> FeO <sub>x</sub> (OH) <sub>y</sub> @NCA | 99               | 61.1                                | 6         |

Table S2. The relevant data of EIS spectra for HER.

| Catalyst           | $R_S$ ( $\Omega$ ) | $R_S+R_{CT}$ ( $\Omega$ ) | $R_{CT}$ ( $\Omega$ ) |
|--------------------|--------------------|---------------------------|-----------------------|
| $Ir_7Co_3$ aerogel | 5.4                | 25.2                      | 19.8                  |
| $Ir_5Co_5$ aerogel | 6.6                | 83.4                      | 76.8                  |
| $Ir_3Co_7$ aerogel | 8.2                | 135.5                     | 127.3                 |
| Ir aerogel         | 5.9                | 39.4                      | 33.5                  |
| Co aerogel         | 5.8                | 488.2                     | 482.4                 |

Table S3. The OER activity comparison between the Ir<sub>7</sub>Co<sub>3</sub> aerogel and recently reported top-level aerogel electrocatalysts in 1.0 M KOH.

| Catalyst                                                  | $\eta_{10}$ (mV)   | Tafel slope (mV·dec <sup>-1</sup> ) | Reference |
|-----------------------------------------------------------|--------------------|-------------------------------------|-----------|
| Ir <sub>7</sub> Co <sub>3</sub> aerogel                   | 269                | 31                                  | This work |
| Ir <sub>5</sub> Co <sub>5</sub> aerogel                   | 288                | 52.4                                | This work |
| Ir <sub>3</sub> Co <sub>7</sub> aerogel                   | 341                | 85.8                                | This work |
| Ir aerogel                                                | 326                | 62.3                                | This work |
| CoNiFe/MnO@CNTs                                           | 275                | 63                                  | 1         |
| Ru <sub>0.7</sub> Co <sub>0.3</sub> aerogel               | 272                | 41.6                                | 2         |
| RuNi <sub>7</sub> FeO <sub>x</sub> (OH) <sub>y</sub> @NCA | 278                | 102.7                               | 6         |
| NiFe <sub>2</sub> O <sub>x</sub> Aero-300-Ar              | 356                | 57                                  | 7         |
| Ni-NCN/CoFe-LDH                                           | 280                | 42                                  | 8         |
| NSCA/FeCo                                                 | 335                | 60                                  | 9         |
| Ni <sub>94</sub> Fe <sub>6</sub> aerogel                  | 380                | -                                   | 10        |
| Ir <sub>3</sub> Cu MAs                                    | 298                | 41                                  | 11        |
| NiCoMn-LDHs                                               | 340( $\eta_{50}$ ) | 87                                  | 12        |

Table S4. The relevant data of EIS spectra for OER.

| Catalyst                         | $R_s$ ( $\Omega$ ) | $R_s+R_{ct}$ ( $\Omega$ ) | $R_{ct}$ ( $\Omega$ ) |
|----------------------------------|--------------------|---------------------------|-----------------------|
| $\text{Ir}_7\text{Co}_3$ aerogel | 5.6                | 42.0                      | 36.4                  |
| $\text{Ir}_5\text{Co}_5$ aerogel | 5.6                | 81.4                      | 75.8                  |
| $\text{Ir}_3\text{Co}_7$ aerogel | 5.7                | 163.3                     | 157.6                 |
| Ir aerogel                       | 6.0                | 119.5                     | 113.5                 |
| Co aerogel                       | 5.1                | 241.6                     | 236.5                 |

## Supplementary Figures

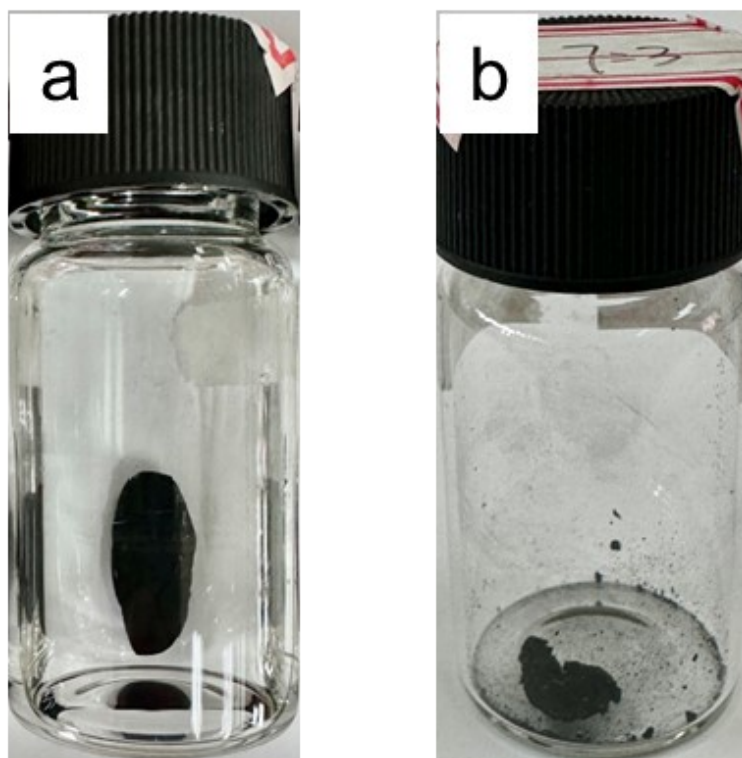

Figure S1. Optical photographs of the  $\text{Ir}_7\text{Co}_3$  aerogel (a) after gelation and (b) after freeze-drying.

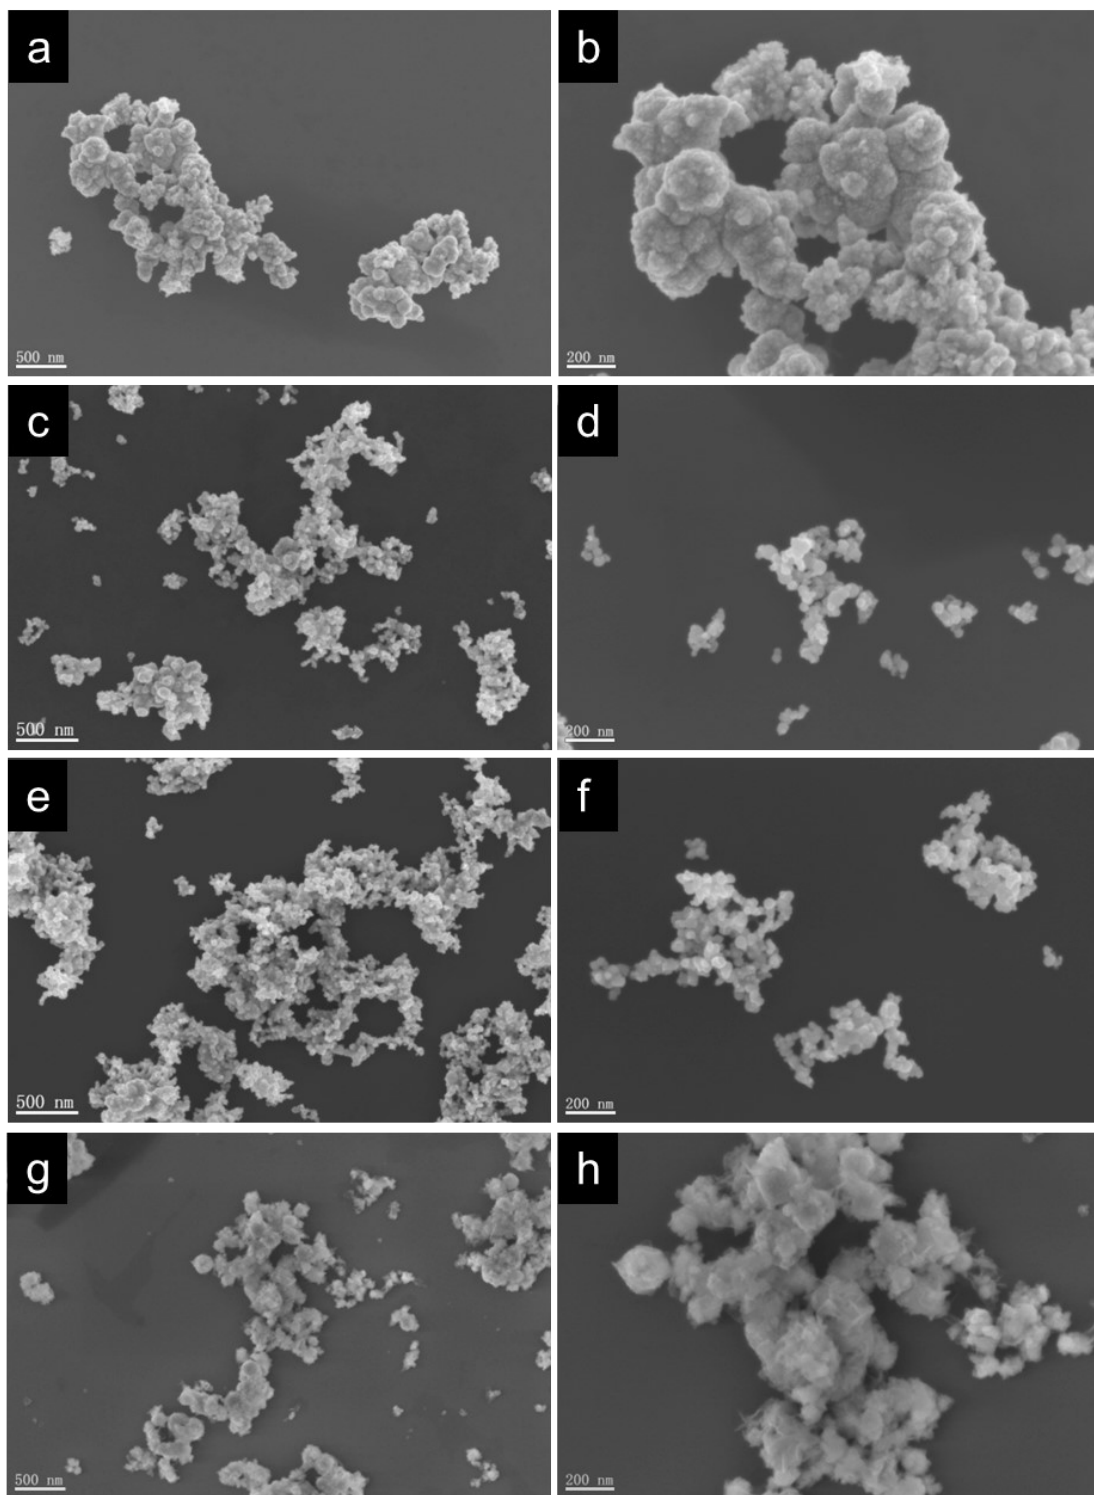

Figure S2. Typical SEM images of the (a-b) Ir aerogel, (c-d) Ir<sub>5</sub>Co<sub>5</sub> aerogel, (e-f) Ir<sub>3</sub>Co<sub>7</sub> aerogel, (g-h) Co aerogel.

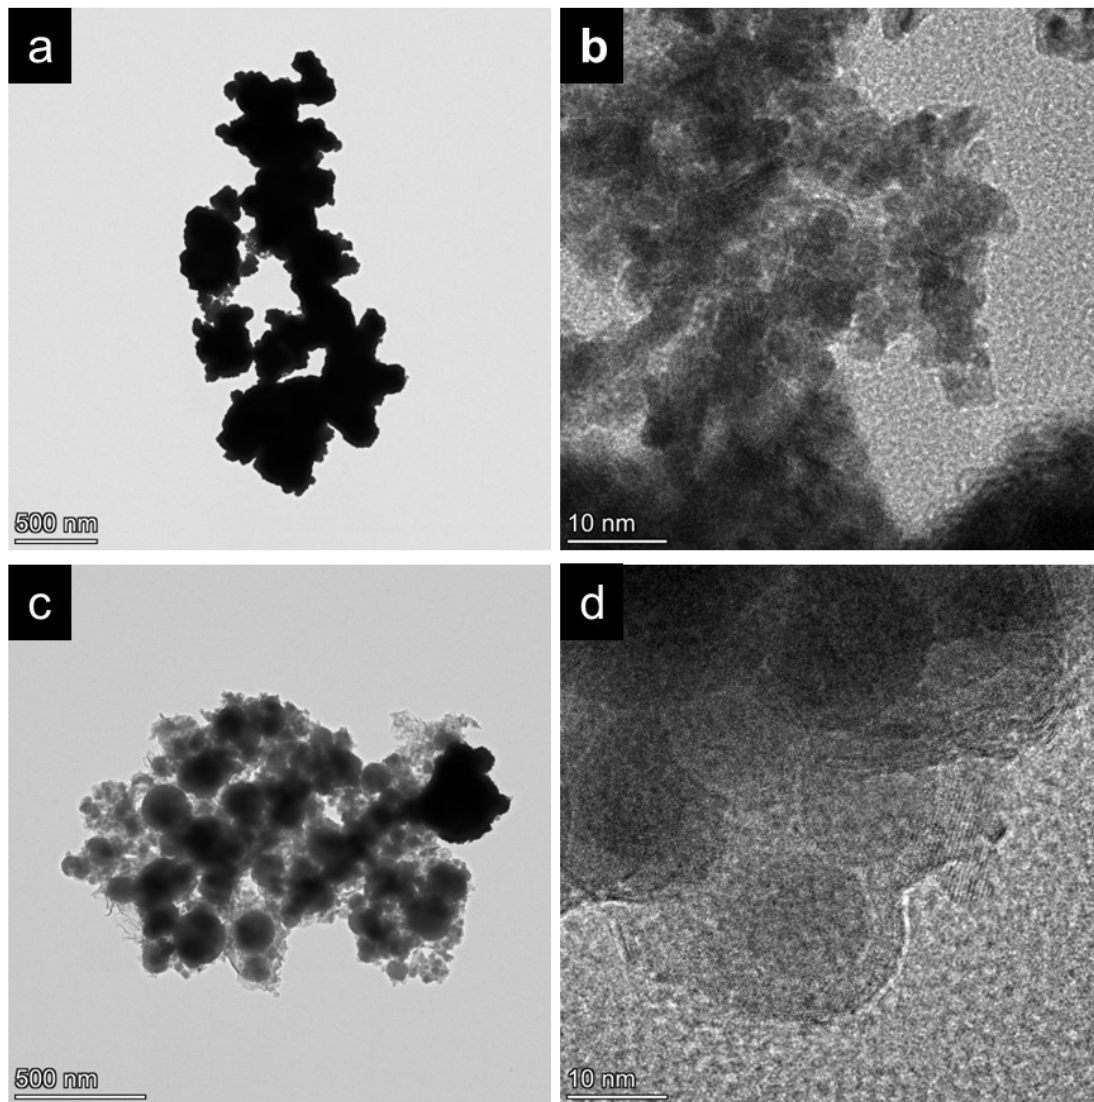

Figure S3. Typical TEM and HRTEM images of the (a-b) Ir and (c-d) Co aerogel.



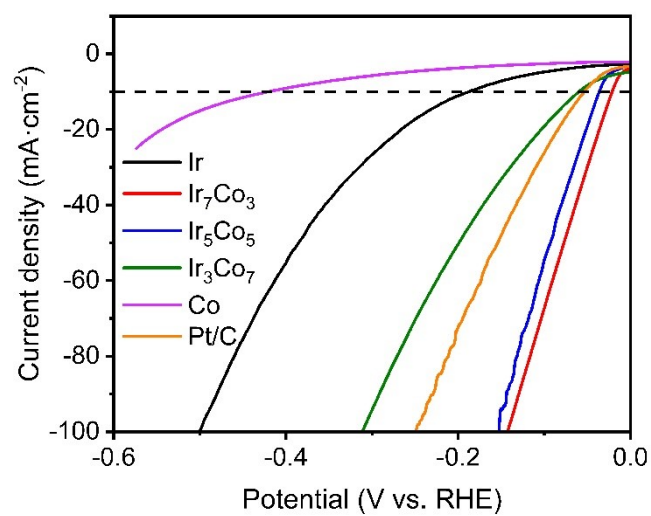

Figure S4. LSV polarization curves of the Ir,  $\text{Ir}_7\text{Co}_3$ ,  $\text{Ir}_5\text{Co}_5$ ,  $\text{Ir}_3\text{Co}_7$ , Co aerogels and Pt/C catalyst towards HER without  $iR$  compensation.

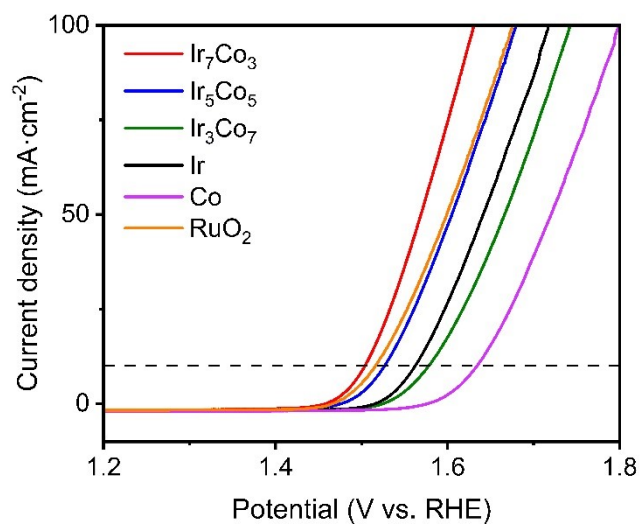

Figure S5. LSV polarization curves of the Ir,  $\text{Ir}_7\text{Co}_3$ ,  $\text{Ir}_5\text{Co}_5$ ,  $\text{Ir}_3\text{Co}_7$ , Co aerogels and  $\text{RuO}_2$  catalyst towards OER without  $iR$  compensation.

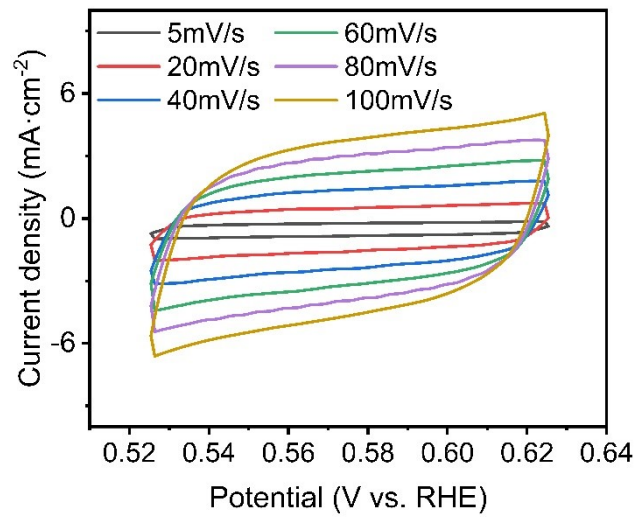

Figure S6. Cyclic voltammograms of the Ir<sub>7</sub>Co<sub>3</sub> aerogel in the range from 0.525 to 0.625 V (vs. Hg/HgO) at different scan rates.

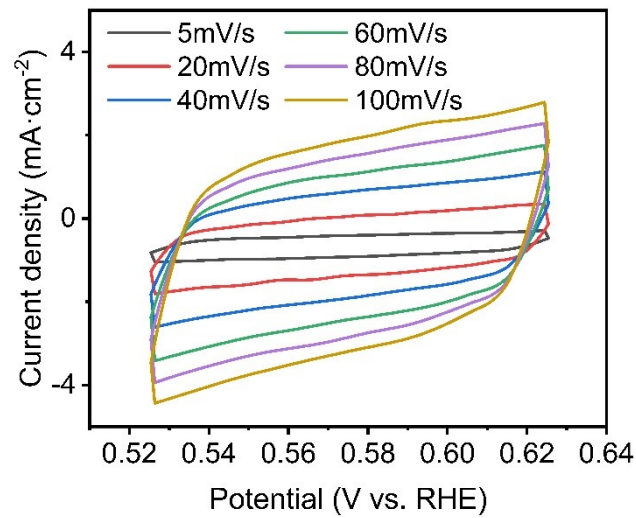

Figure S7. Cyclic voltammograms of the Ir<sub>5</sub>Co<sub>5</sub> aerogel in the range from 0.525 to 0.625 V (vs. Hg/HgO) at different scan rates.

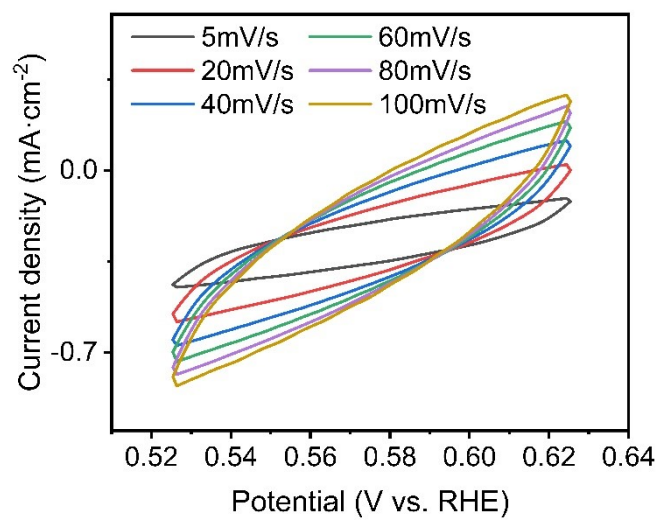

Figure S8. Cyclic voltammograms of the Ir<sub>3</sub>Co<sub>7</sub> aerogel in the range from 0.525 to 0.625 V (vs. Hg/HgO) at different scan rates.

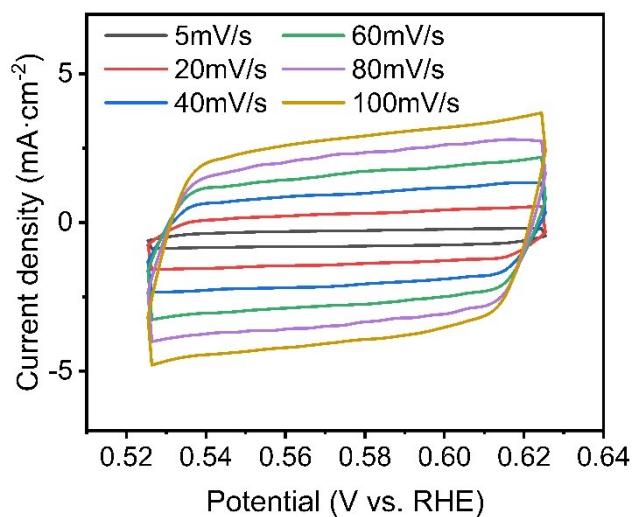

Figure S9. Cyclic voltammograms of the Ir aerogel in the potential range from 0.525 to 0.625 V (vs. Hg/HgO) at different scan rates.

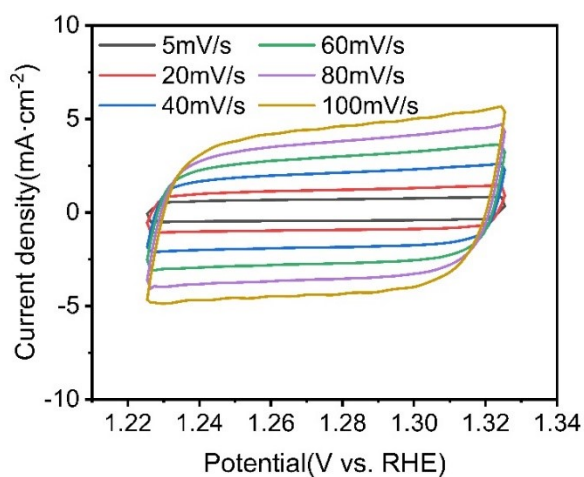

Figure S10. Cyclic voltammograms of the Ir<sub>7</sub>Co<sub>3</sub> aerogel in the potential range from 1.225 to 1.325 V (vs. Hg/ HgO) at different scan rates.

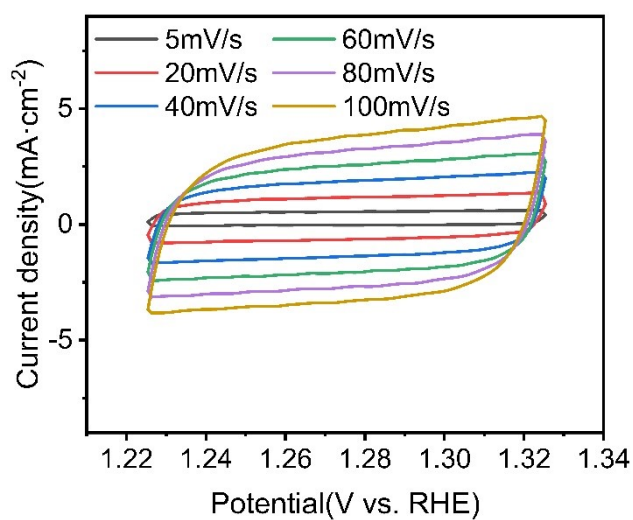

Figure S11. Cyclic voltammograms of the Ir<sub>5</sub>Co<sub>5</sub> aerogel in the potential range from 1.225 to 1.325 V (vs. Hg/ HgO) at different scan rates.

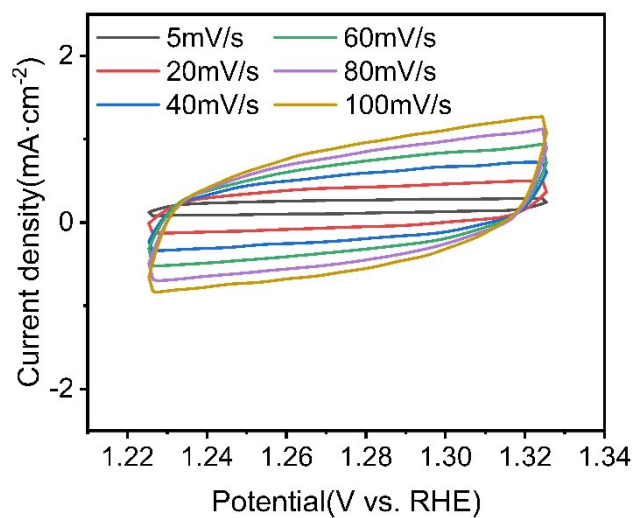

Figure S12. Cyclic voltammograms of the Ir<sub>3</sub>Co<sub>7</sub> aerogel in the potential range from 1.225 to 1.325 V (vs. Hg/HgO) at different scan rates.

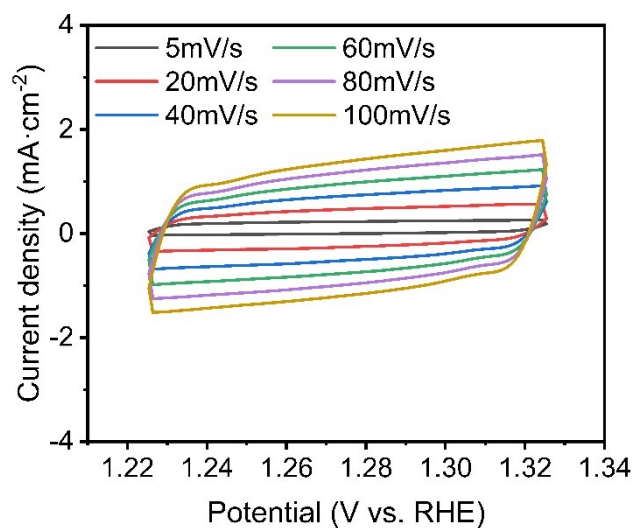

Figure S13. Cyclic voltammograms of the Ir aerogel in the potential range from 1.225 to 1.325 V (vs. Hg/HgO) at different scan rates.

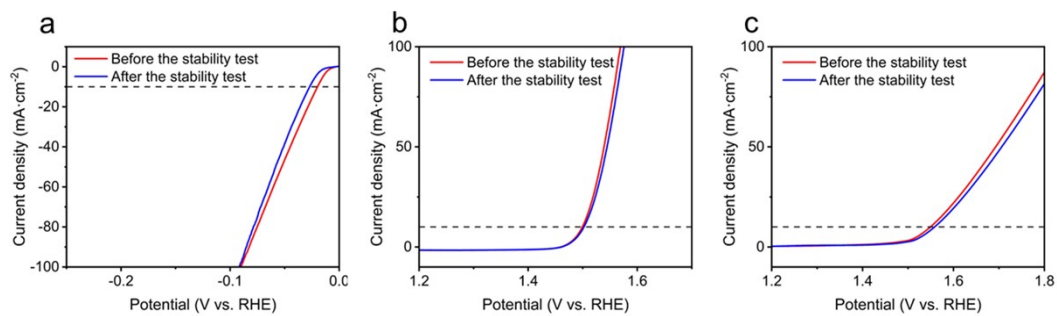

Figure S14. The LSV polarization curves before and after the stability test.

## References

1. C. Zhou, X. Han, F. Zhu, X. Zhang, Y. Lu, J. Lang, X. Cao and H. Gu, *Int. J. Hydrogen Energy*, 2022, **47**, 27775-27786.
2. Z. Lin, S. Liu, Y. Liu, Z. Liu, S. Zhang, X. Zhang, Y. Tian and Z. Tang, *J. Power Sources*, 2021, **514**, 230600.
3. H. Liu, F. Yang, F. Chen, S. Che, N. Chen, C. Xu, N. Wu, W. Wei and Y. Li, *Mater. Chem. Front.*, 2023, **7**, 1365-1373.
4. S. Yan, X. Chen, W. Li, M. Zhong, J. Xu, M. Xu, C. Wang, N. Pinna and X. Lu, *Adv. Sci.*, 2024, **11**, 2307061.
5. H. Liu, F. Yang, Z. Xu, X. Yan, F. Chen, C. Xu, S. Che and Y. Li, *Electrochim. Acta*, 2022, **430**, 141075.
6. S. Huang, J. Lu, X. Wu, H. Zhu, X. Shen, S. Cui and X. Chen, *Appl. Catal. A- Gen.*, 2023, **664**, 230600.
7. C. N. Chervin, P. A. DeSario, J. F. Parker, E. S. Nelson, B. W. Miller, D. R. Rolison and J. W. Long, *ChemElectroChem*, 2016, **3**, 1369-1375.
8. J. Zhang, L. Hao, Z. Chen, Y. Gao, H. Wang and Y. Zhang, *J. Colloid Interface Sci.*, 2023, **650**, 816-824.
9. Y. Zhang, X. Zhang, Y. Li, J. Wang, S. Kawi and Q. Zhong, *Nano Res.*, 2023, **16**, 6870-6880.
10. W. Moschkowitsch, N. Zion, H. C. Honig, N. Levy, D. A. Cullen and L. Elbaz, *ACS Catal.*, 2022, **12**, 12162-12169.
11. Q. Shi, C. Zhu, H. Zhong, D. Su, N. Li, M. H. Engelhard, H. Xia, Q. Zhang, S. Feng, S. P. Beckman, D. Du and Y. Lin, *ACS Energy Lett.*, 2018, **3**, 2038-2044.
12. B. Liu, M. Zhang, Y. Wang, Z. Chen and K. Yan, *J. Alloys Compd.*, 2021, **852**, 156949.
